# Supplementary material for: Integrated wearable electrochemical sensor based on silk protein for the detection of uric acid in sweat
Source: Royal Society of Chemistry journal article supplement (doi:10.1039/d5nj02422f), 2025-01-01
Supplement: d5nj02422f1.pdf [file d5nj02422f1.pdf]

## Supporting Information

### Integrated wearable electrochemical sensor based on silk protein for the detection of uric acid in sweat

---

*Chaowei Li<sup>a</sup>, Yanan Wang<sup>bc</sup>, Jian Li<sup>b</sup>, Lili Lv<sup>c</sup>, Xiyue Cao<sup>bc</sup>, Jianfei Xia<sup>c</sup>, Wengui Xu<sup>a\*</sup>*

*<sup>a</sup> Department of Molecular Imaging and Nuclear Medicine, Tianjin Medical University Cancer Institute and Hospital, Tianjin 300060, China*

*<sup>b</sup> The Affiliated Hospital of Qingdao University, Qingdao, China*

*<sup>c</sup> Qingdao Application Technology Innovation Center of Photoelectric Biosensing for Clinical Diagnosis and Treatment, Qingdao University, Qingdao 266071, China.*

\* Corresponding author.

E-mail: xwgtjzlyy@163.com.

## Contents

**Reagents and Material.**

**Apparatus and Characterization.**

**Figure S1.** TEM images of (A) Z-800 and (B) Z-900.

**Figure S2.** Raman spectrum of Z-1000.

**Figure S3.** (A) Schematic diagram of water vapor transmission tests, (B) The mass changes of the pure water that remained in the bottles.

**Figure S4.** Stress-strain curves of silk membranes without glycerol (SF-0) and with 0.01g glycerol added (SF-0.01).

**Figure S5.** Multimeter measurement of silk membrane resistance at different stretched lengths.

**Figure S6.** Resistance change of the silk membrane under different tensile strains.

**Figure S7.** (A) Peak currents of 0.1 mM UA on Z-1000/SFE at different pH, (B) peak potential versus pH.

**Figure S8.** Peak currents of 0.1 mM UA with various Z-1000 loading.

**Figure S9.** Current response of Z-1000/SFE in 0.1 mM UA after 20 days of storage in room temperature.

**Table S1.** Comparison of analytical performances of several electrochemical sensors for UA.

**Table S2.** Comparison of analytical results for UA by wearable sensor and HPLC in sweat samples.

**Table S3.** Determination of UA in sweat samples for recovery using Z-1000/SFE.

## Reagents and Material

Phosphate-buffered saline (PBS) was purchased from Sangon Biotech (Shanghai) Co., Ltd. Ethanol ( $\text{C}_2\text{H}_5\text{OH}$ ),  $\text{NaHCO}_3$ , glycerin and formic acid ( $\text{CH}_2\text{O}_2$ ) were all purchased from Sinopharm Chemical Reagent Co., Ltd.  $\text{Zn}(\text{NO}_3)_2 \cdot 6\text{H}_2\text{O}$ , 2-methylimidazole and  $\text{CaCl}_2$  was purchased from Aladdin Reagent Co., Ltd. Petroleum jelly was provided by Shanghai Macklin Biochemical Technology Co., Ltd. Ag/AgCl ink and carbon ink were purchased from Weihai Poten Technology Co., Ltd. (Wei-hai, China). The secondary distilled water required for the experiment was supplied by Milli-Q (Millipore, USA). PBS solution was used to prepare the following buffers: 1 mM PBS solution (pH 7.0) and 10 mM PBS solution (containing 100 mM NaCl, pH 7.0). The chemical reagents used are all analytical grade.

## **Apparatus and characterization**

Sample morphology analysis was performed using a field emission scanning electron microscope (FESEM, Hitachi Regulus 8100) and a transmission electron microscope (TEM, Hitachi HT7700). Phase analysis and surface chemical characterization were performed using a powder X-ray diffractometer (PXRD, Japan Smart Lab). The crystal structure of the obtained samples was studied using a laser micro-Raman spectrometer (Raman, Thermofisher DXR2, USA). Electrochemical measurements were performed using a CHI 660E electrochemical workstation.

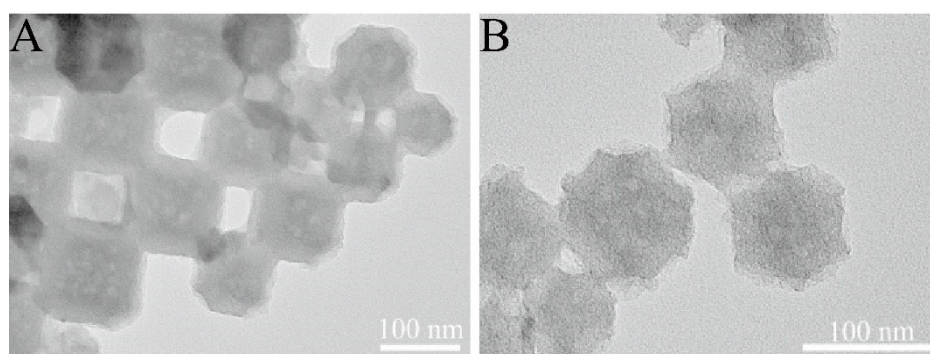

**Figure S1.** TEM images of (A) Z-800 and (B) Z-900.

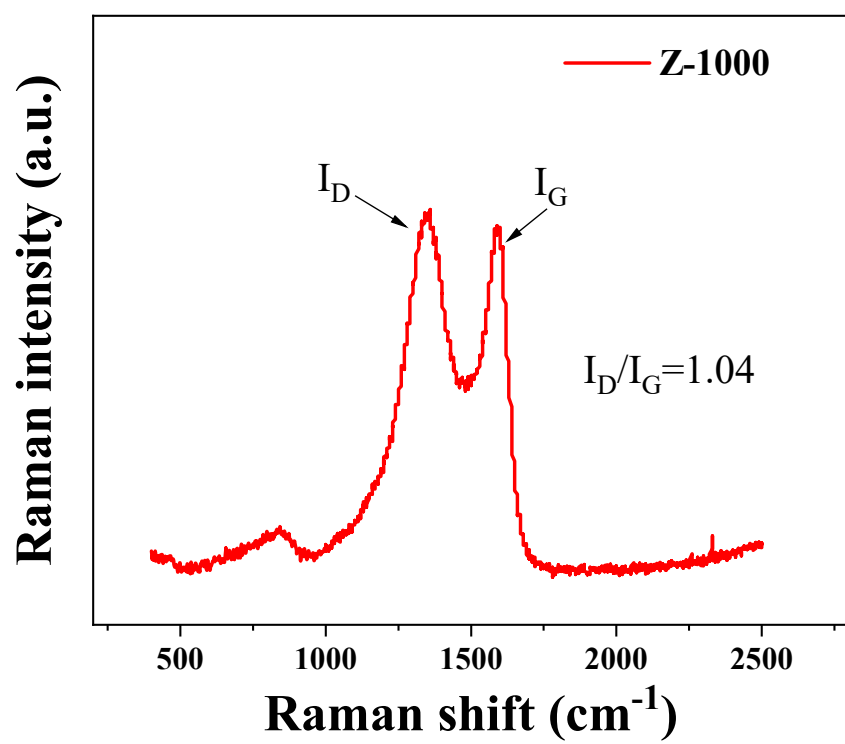

**Figure S2.** Raman spectrum of Z-1000.

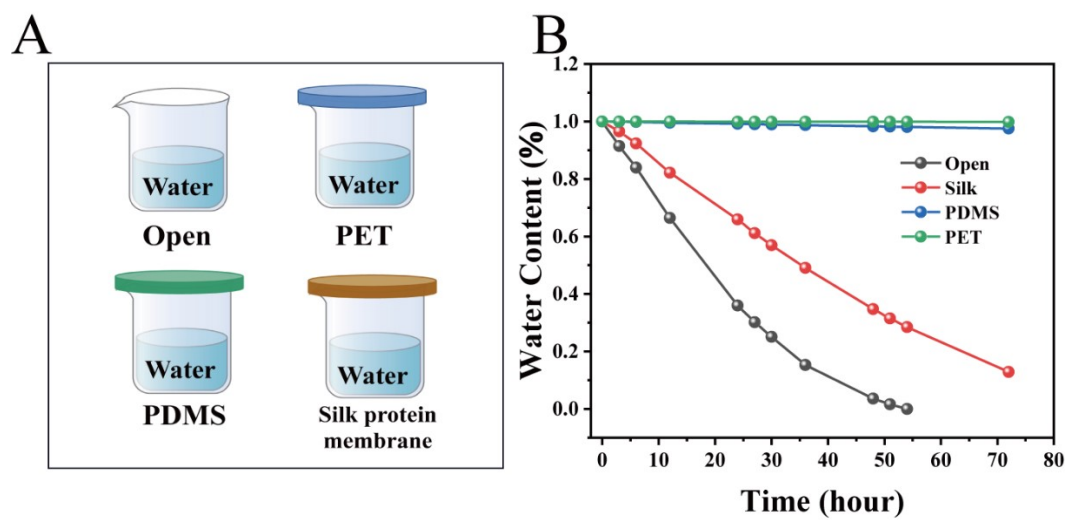

**Figure S3.** (A) Schematic diagram of water vapor transmission tests, (B) The mass changes of the pure water that remained in the bottles.

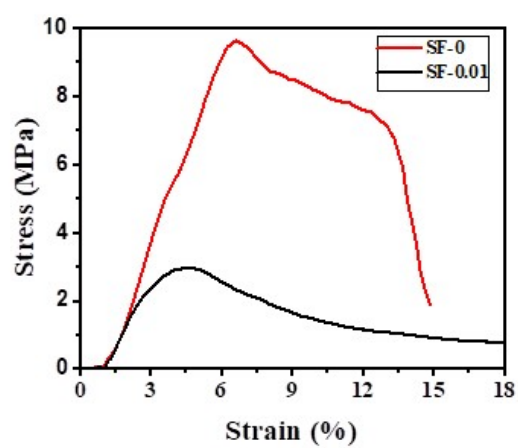

**Figure S4.** Stress-strain curves of silk membranes without glycerol (SF-0) and with 0.01g glycerol added (SF-0.01).



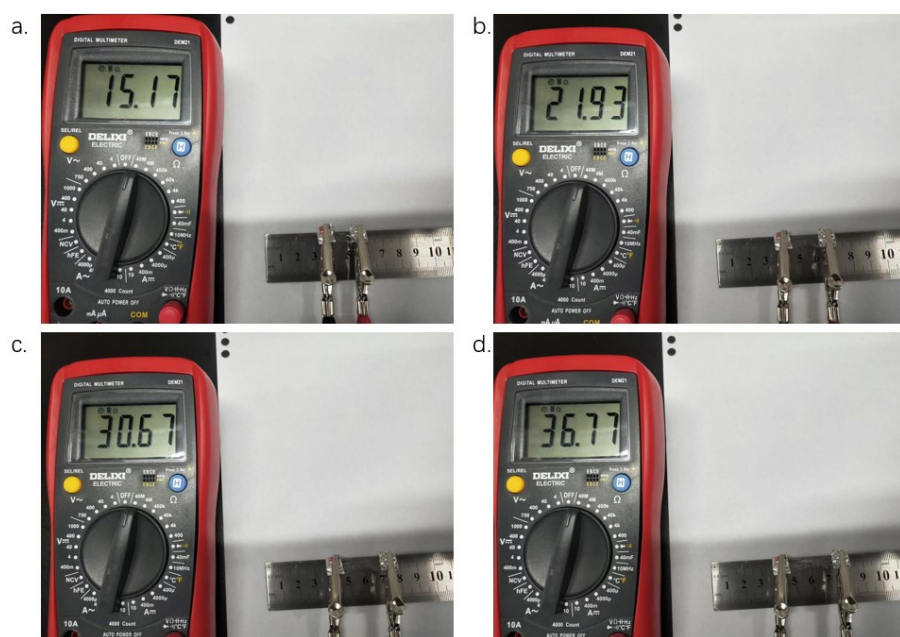

**Figure S5.** Multimeter measurement of silk membrane resistance at different stretched lengths.

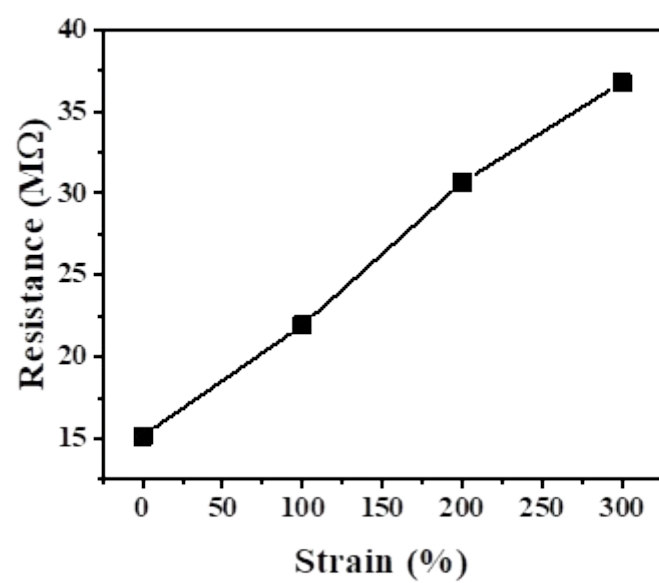

**Figure S6.** Resistance change of the silk membrane under different tensile strains.

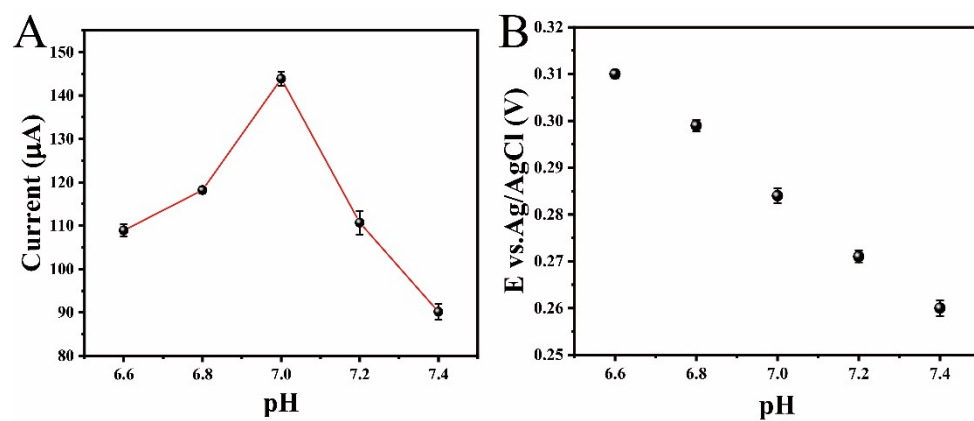

**Figure S7.** (A) Peak currents of 0.1 mM UA on Z-1000/SFE at different pH, (B) peak potential versus pH.

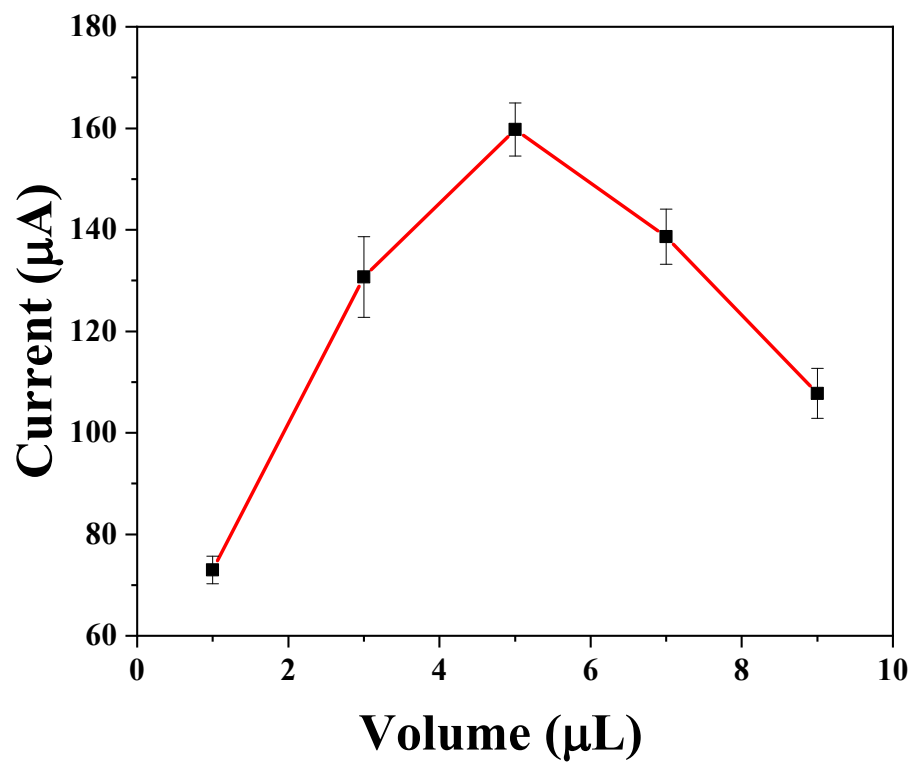

**Figure S8.** Peak currents of 0.1 mM UA with various Z-1000 loading.

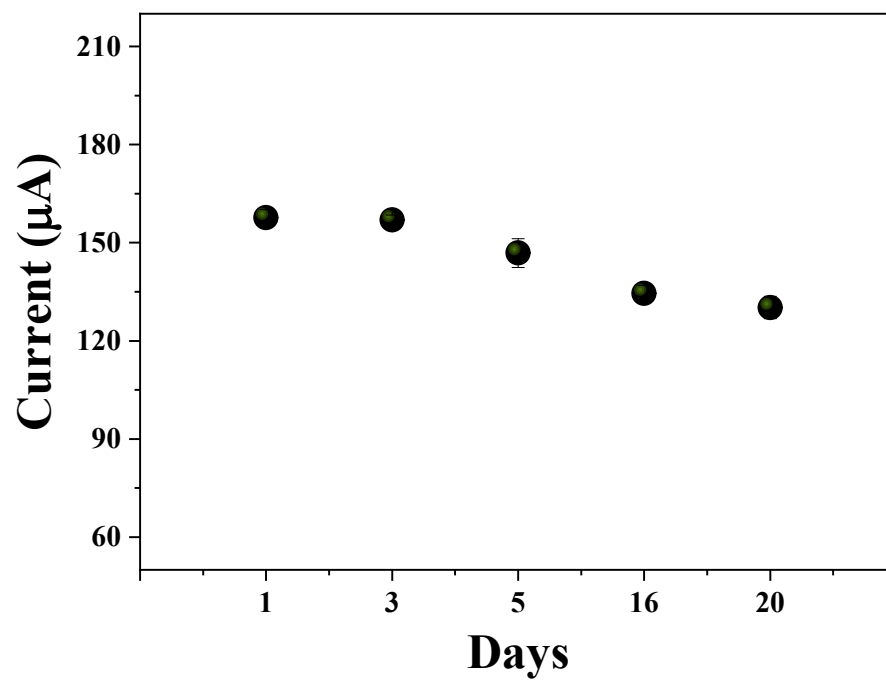

**Figure S9.** Current response of Z-1000/SFE in 0.1 mM UA after 20 days of storage in room temperature.

**Table S1.** Comparison of analytical performances of several electrochemical sensors for UA.

| Sensor        | Method | Linear range (M)                            | LOD (M)               | Ref.      |
|---------------|--------|---------------------------------------------|-----------------------|-----------|
| GO-ZnO/PGE    | DPV    | $1.00 \times 10^{-5} - 1.00 \times 10^{-4}$ | $4.76 \times 10^{-6}$ | 1         |
| rGO-ZnO/GCE   | DPV    | $3.00 \times 10^{-6} - 3.30 \times 10^{-4}$ | $1.08 \times 10^{-6}$ | 2         |
| PdNPs/rGO/GCE | DPV    | $1.50 \times 10^{-5} - 4.20 \times 10^{-5}$ | $1.67 \times 10^{-5}$ | 3         |
| NPGE          | DPV    | $6.50 \times 10^{-5} - 1.50 \times 10^{-3}$ | $9.00 \times 10^{-6}$ | 4         |
| MWCNT-PEDOT   | DPV    | $1.00 \times 10^{-5} - 2.50 \times 10^{-4}$ | $1.00 \times 10^{-5}$ | 5         |
| Z-1000/SFE    | I-t    | $1.00 \times 10^{-6} - 3.00 \times 10^{-4}$ | $4.2 \times 10^{-7}$  | This work |

**References**

1. Y. An, T. Y. Jin, Y. Y. Zhu, F. Zhang and P. G. He, *Biosensors & Bioelectronics*, 2019, **142**.
2. X. Zhang, Y. C. Zhang and L. X. Ma, *Sensors and Actuators B-Chemical*, 2016, **227**, 488-496.
3. Y. Y. Wei, Y. Y. Liu, Z. F. Xu, S. J. Wang, B. Chen, D. Zhang and Y. X. Fang, *International Journal of Analytical Chemistry*, 2020, **2020**.
4. T. A. Silva, M. R. K. Khan, O. Fatibello and M. M. Collinson, *Journal of Electroanalytical Chemistry*, 2019, **846**.
5. K. C. Lin, T. H. Tsai and S. M. Chen, *Biosensors & Bioelectronics*, 2010, **26**, 608-614.

**Table S2. Comparison of analytical results for UA by wearable sensor and HPLC in sweat samples.**

| Sample | Wearable sensor | HPLC            | $t_{\text{exptl}}$<br>( $t_{\text{crit}}[0.05,4] = 2.78$ ) |
|--------|-----------------|-----------------|------------------------------------------------------------|
| 1      | $26.7 \pm 0.47$ | $27.4 \pm 0.48$ | 0.94                                                       |
| 2      | $31.3 \pm 0.89$ | $30.8 \pm 0.43$ | 1.21                                                       |
| 3      | $18.9 \pm 0.67$ | $18.4 \pm 0.57$ | 0.77                                                       |

The t-test was performed to verify the correlation of test results between wearable electrochemical sensor ( $n_1$ ,  $s_1$ ,  $\bar{x}_1$ ) and high-performance liquid chromatography (HPLC) method ( $n_2$ ,  $s_2$ ,  $\bar{x}_2$ ). The combined standard deviation of two data sets was calculated according to the formula:

$$s = \sqrt{\frac{s_1^2(n_1 - 1) + s_2^2(n_2 - 1)}{(n_1 - 1) + (n_2 - 1)}}$$

then the t-value was calculated, and the formula was

$$t = \frac{|\bar{x}_1 - \bar{x}_2|}{s} \sqrt{\frac{n_1 n_2}{n_1 + n_2}}$$

**Table S3.** Determination of UA in sweat samples for recovery using Z-1000/SFE.

| Sample | Added ( $\mu\text{M}$ ) | Found ( $\mu\text{M}$ ) | Recovery (%) | RSD (%) |
|--------|-------------------------|-------------------------|--------------|---------|
| 1      | 10                      | $9.96 \pm 0.410$        | 99.6         | 2.70    |
| 2      | 15                      | $15.2 \pm 0.212$        | 101          | 1.06    |
| 3      | 20                      | $25.5 \pm 0.444$        | 102          | 1.02    |
